# Supplementary material for: Distribution-preserving data augmentation
Source: PeerJ journal article supplement (doi:10.7717/peerj-cs.571), 2021-05-27

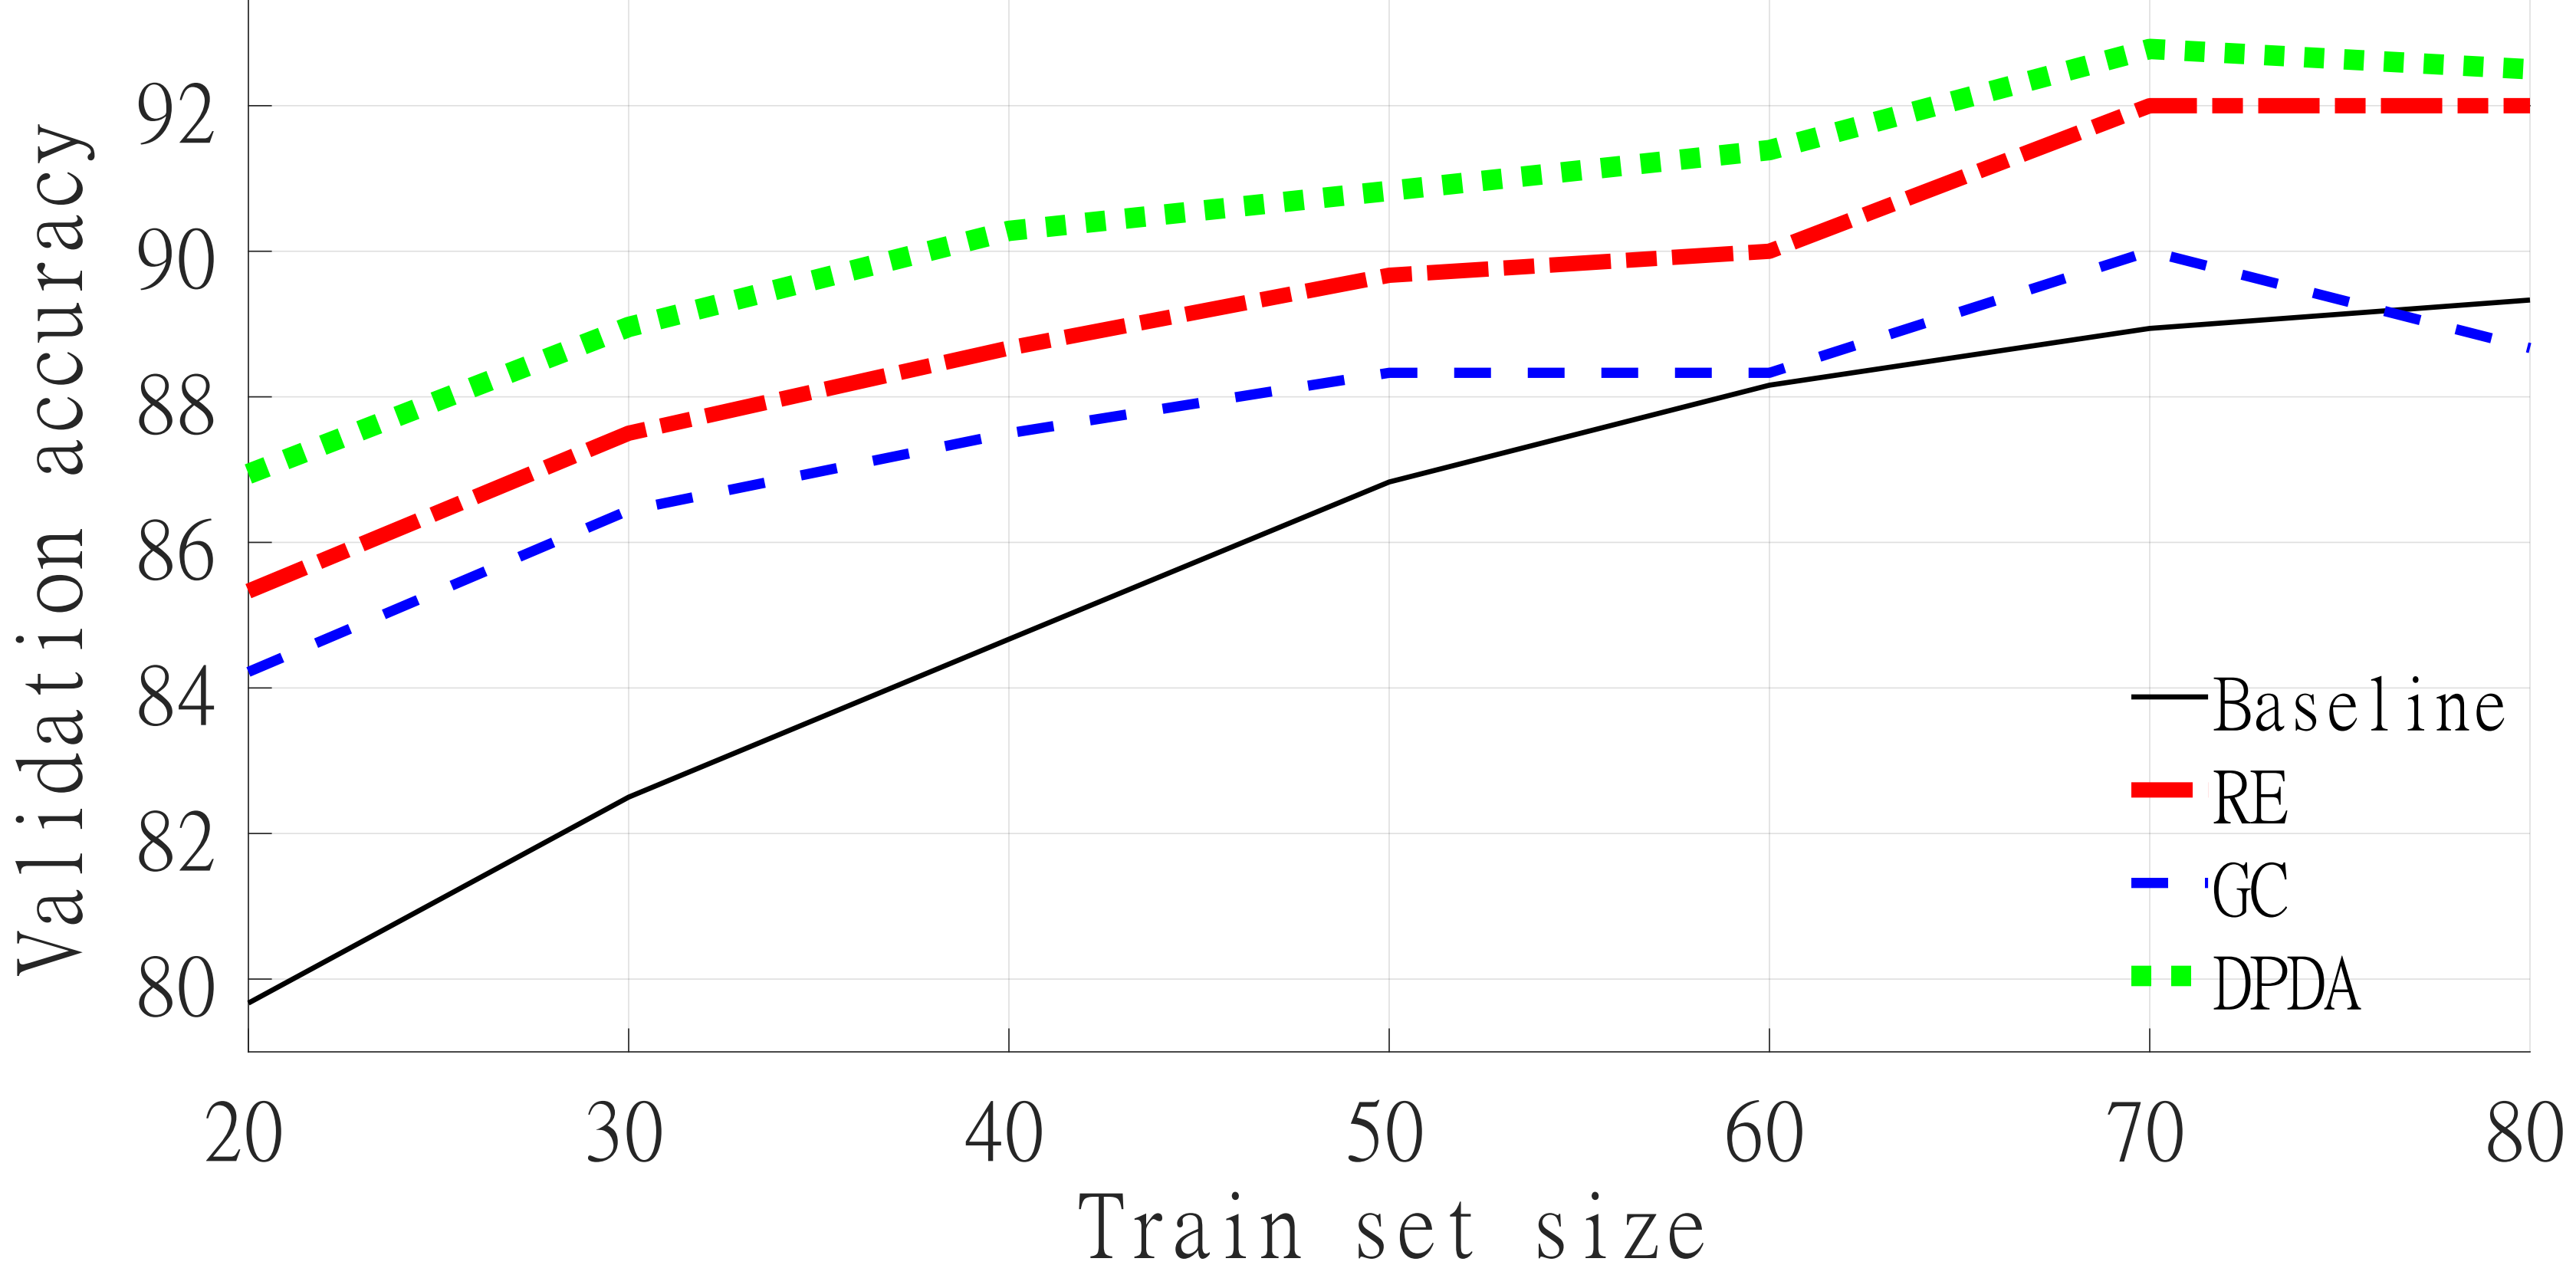

Supplement: Figure_version_of_Table_4.pdf [file Figure_version_of_Table_4.pdf]
